# Supplementary material
Source: HighWire-hosted journal article supplement (https://bmjopen.bmj.com/content/7/1/e013829)
Supplement: inline-supplementary-material-1 [file inline-supplementary-material-1.pdf]

## Supplementary File. COREQ Checklist

| No.                                            | Item                                     | Comment                                                                                                                                     |
|------------------------------------------------|------------------------------------------|---------------------------------------------------------------------------------------------------------------------------------------------|
| <b>Domain 1: Research team and reflexivity</b> |                                          |                                                                                                                                             |
| 1                                              | Interview/facilitator                    | RW ( Domain 1 – refer <i>Page 5</i> )                                                                                                       |
| 2                                              | Credentials                              | RW (PhD candidate, NP, MN, RN, BN) <i>Page 5</i>                                                                                            |
| 3                                              | Occupation                               | RW (Nurse Practitioner); KH/RM (Health Economists); AT (Qualitative Researcher); SP (Nephrologists) SW (Indigenous Policy) <i>Page 5</i>    |
| 4                                              | Gender                                   | RW (Female) <i>Page 5</i>                                                                                                                   |
| 5                                              | Experience and training                  | RW has conducted and published qualitative research. <i>Page 5</i>                                                                          |
| 6                                              | Relationship established                 | Some participants were known to RW. <i>Page 5</i>                                                                                           |
| 7                                              | Participant knowledge of the interviewer | RW is a Nephrology Nurse Practitioner currently undertaking her PhD. <i>Page 5</i>                                                          |
| 8                                              | Interviewer characteristics              | RW is a Nephrology Nurse Practitioner with a special interest in pre-dialysis education, patient education and home dialysis. <i>Page 5</i> |
| <b>Study design</b>                            |                                          |                                                                                                                                             |
| 9                                              | Theoretical framework                    | Adapted grounded theory and inductive approach (Study Design Refer <i>Page 5 &amp; 6</i> )                                                  |
| 10                                             | Sampling                                 | Purposive <i>Page 8</i>                                                                                                                     |
| 11                                             | Method of approach                       | Face to face <i>Page 5</i>                                                                                                                  |
| 12                                             | Sample size                              | Self-identified as New Zealand Māori and had received education about treatment modalities <i>Page 5</i>                                    |
| 13                                             | Non-participation                        | N = 0 <i>Page 5</i>                                                                                                                         |
| 14                                             | Setting of data collection               | Patient home or renal clinic <i>Page 5</i>                                                                                                  |
| 15                                             | Presence of non-participants             | No interpreter required                                                                                                                     |
| 16                                             | Description of sample                    | Participants from pre-dialysis and all dialysis modalities <i>Page 5 &amp; Table 1</i>                                                      |
| 17                                             | Interview guide                          | Attached (See Appendix 1)                                                                                                                   |
| 18                                             | Repeat interviews                        | Member checking with some participants <i>Page 6</i>                                                                                        |
| 19                                             | Audio/visual recording                   | Interviews were audio recorded <i>Page 6</i>                                                                                                |
| 20                                             | Field notes                              | RW recorded field notes <i>Page 6</i>                                                                                                       |
| 21                                             | Duration                                 | 35 minutes to 120 minutes <i>Page 6</i>                                                                                                     |
| 22                                             | Data saturation                          | Yes <i>Page 6</i>                                                                                                                           |
| 23                                             | Transcripts returned                     | No                                                                                                                                          |
| <b>Analysis and findings</b>                   |                                          |                                                                                                                                             |
| 24                                             | Number of data coders                    | RW/SP/SW – (Analysis and Findings – See <i>Page 6 - 10</i> )                                                                                |
| 25                                             | Description of the coding tree           | No                                                                                                                                          |
| 26                                             | Derivation of themes                     | Adapted grounded theory and thematic analysis <i>Page 6</i>                                                                                 |
| 27                                             | Software                                 | HyperRESEARCH <i>Page 6</i>                                                                                                                 |
| 28                                             | Participant checking                     | Yes (Member Checking – <i>Page 6</i> )                                                                                                      |
| 29                                             | Quotations presented                     | Yes (See <i>Table 2</i> )                                                                                                                   |
| 30                                             | Data and findings consistent             | Quotations provided to illustrate each theme. (See <i>Table 2</i> )                                                                         |
| 31                                             | Clarity of major themes                  | Yes <i>Page 7 &amp; Figure 1</i>                                                                                                            |
| 32                                             | Clarity of minor themes                  | Yes <i>Page 7 &amp; Figure 1</i>                                                                                                            |
